# Supplementary material for: A long-wavelength activable AIEgen fluorescent probe for HClO and cell apoptosis imaging
Source: Royal Society of Chemistry journal article supplement (doi:10.1039/d1an01430g), 2021-01-01
Supplement: d1an01430g1.pdf [file d1an01430g1.pdf]

## Supplementary Information for

### A long-wavelength activable AI-Egen fluorescent probe for HClO and cell apoptosis imaging

Mengyun Wang<sup>a</sup>, Xiaojing Han<sup>a</sup>, Xiaopeng Yang<sup>a</sup>, Jianfei Liu<sup>a</sup>, Xiangzhi Song<sup>b</sup>, Weimin Zhu<sup>a\*</sup>, Yong Ye<sup>a\*</sup>

<sup>a</sup>Green Catalysis Center, and College of Chemistry, Zhengzhou University, Zhengzhou 450001, China

<sup>b</sup>College of Chemistry & Chemical Engineering, Central South University, Changsha 410083, China

#### EXPERIMENTAL SECTION

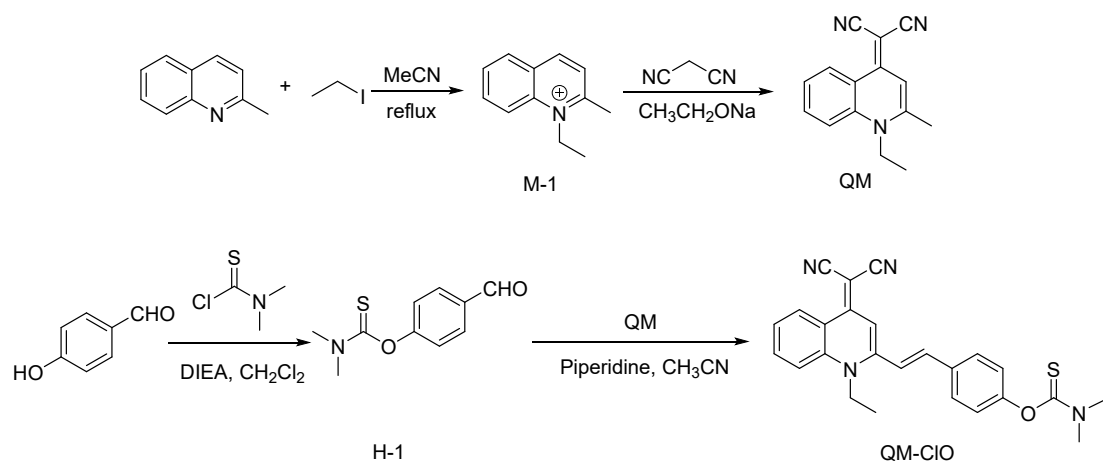

**Scheme S1.** Synthetic route of QM-CIO.

**Synthesis of M-1.** Under N<sub>2</sub> atmosphere, 2-methylquinoline (1.43 g, 10 mmol) and iodoethane (4.71 g, 30 mmol) were dissolved in acetonitrile (20 mL) and refluxed for 12 h. Then the reaction product was concentrated under reduced pressure to obtain a light yellow solid M-1 as a crude product, which can be used in the next reaction without further purification.

**Synthesis of QM.** Under ice-water bath conditions, compound M-1 (1.74 g, 6 mmol) and malononitrile (1.00 g, 15 mmol) were dissolved in absolute ethanol (20 mL), and sodium ethoxide solution (20 mL anhydrous Ethanol, 0.97 g sodium). After 4 hours of

reaction, the mixture was poured into 500 mL ice water, and the pH was adjusted to 7-8 with 1 M hydrochloric acid solution. The resulting precipitate was filtered, washed with distilled water and dried in vacuum to obtain the desired product QM: yellow solid (1.06 g, 78%).

**Synthesis of H-1.** P-Hydroxybenzaldehyde (2 mmol, 0.12 g) and dimethylthiocarbamoyl chloride (10 mmol, 1.24 g) were dissolved in 10 mL of anhydrous dichloromethane, then 400  $\mu$ L DIEA was added, and the mixture was stirred at room temperature for 4 hours. Concentrated under reduced pressure to remove dichloromethane, and then purified by column chromatography(0.17 g, 40%).

**Apparatus.** Absorption and fluorescence emission spectra were measured using HP-8453 UV/Vis spectrometer and F-4600 FL spectrophotometer. The slit width is 5 nm/5 nm, excitation voltage is 700V. Nuclear magnetic resonance (NMR) spectra were carried out by using Bruker DTX-400 spectrometer. High-resolution mass spectrometry (HRMS) was performed on Agilent ESI-Q-TOF mass instrument. ESI mass spectra were implemented on the HPLCQ-ToF HR-MS. The fluorescence imaging of cells were tested by confocal laser-scanning microscope (Leica TCS SP8). Dynamic light scattering (DLS) was performed using NanoPlus-3 DLS particle size/zeta potential analyzer.

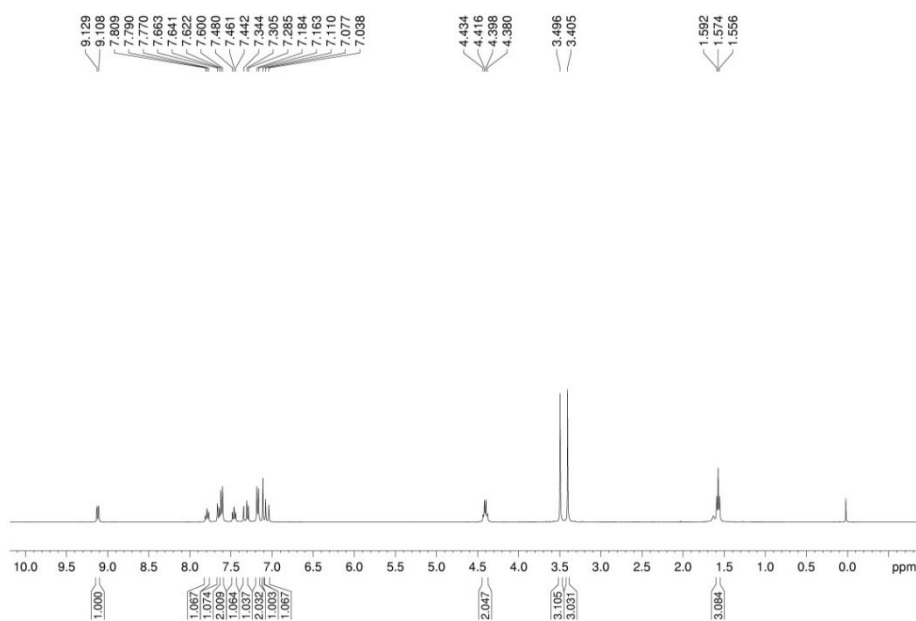

**Fig S1.** <sup>1</sup>H NMR spectrum of QM-C10 in CDCl<sub>3</sub>.

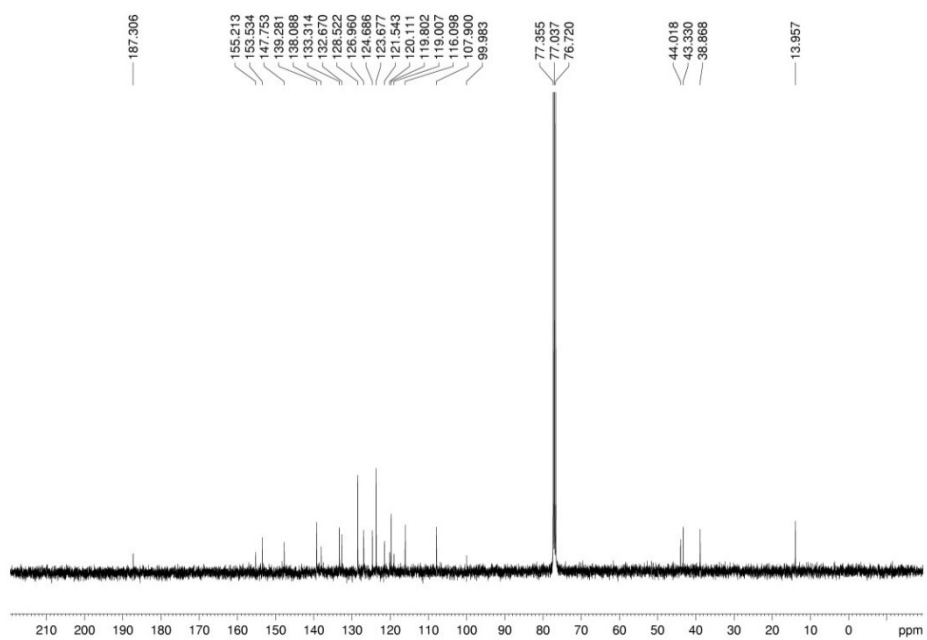

Fig S2.  $^{13}\text{C}$  NMR spectrum of QM-C10 in  $\text{CDCl}_3$ .

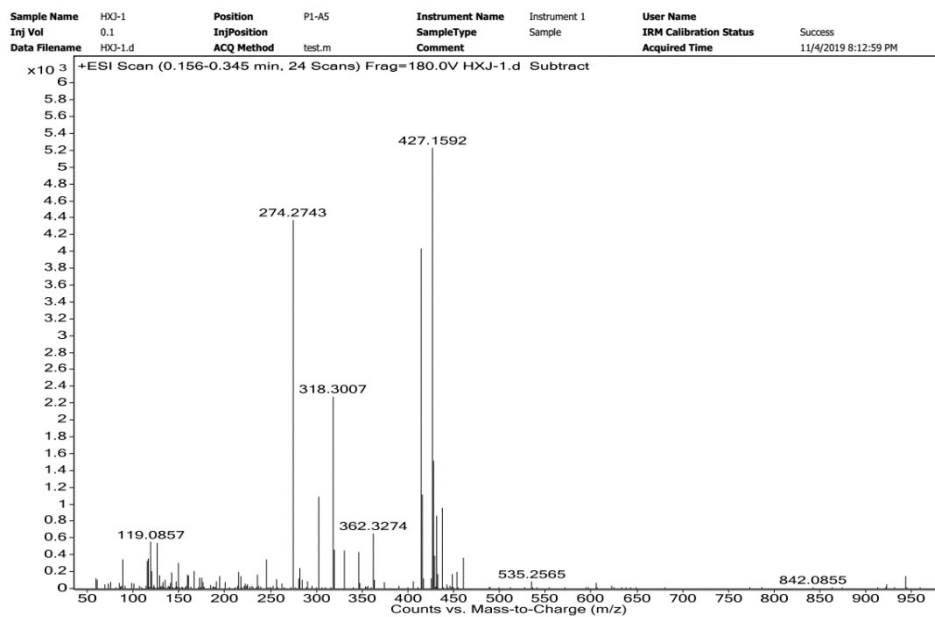

Fig S3. HR-MS spectra of QM-C10.

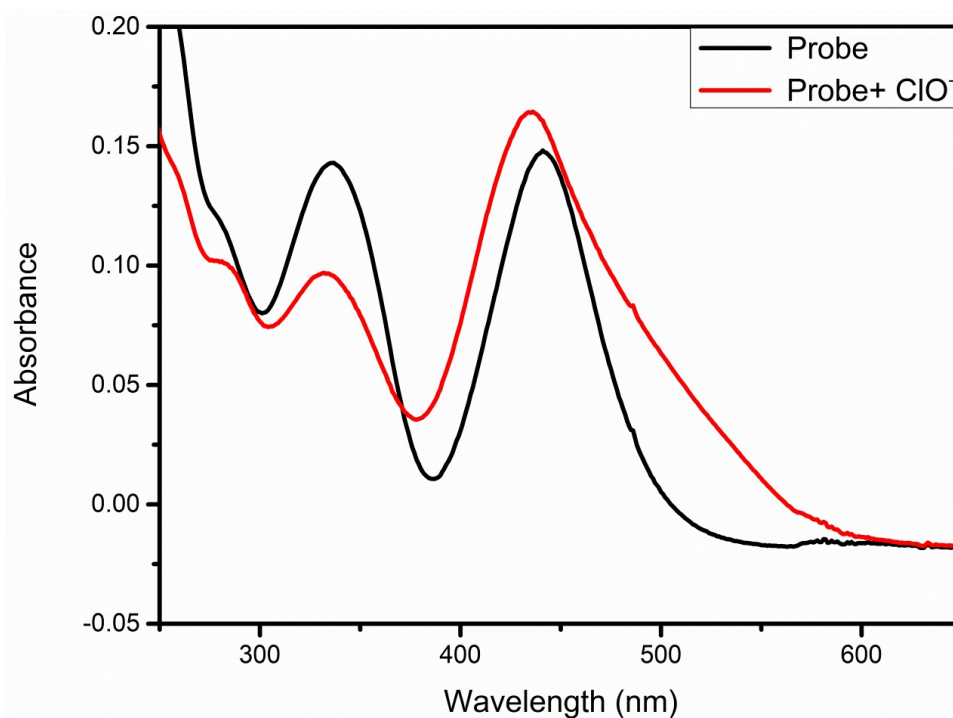

Fig S4. The UV-vis spectra of probe QM-CIO (10.0  $\mu\text{M}$ ) in the presence of  $\text{ClO}^-$ .

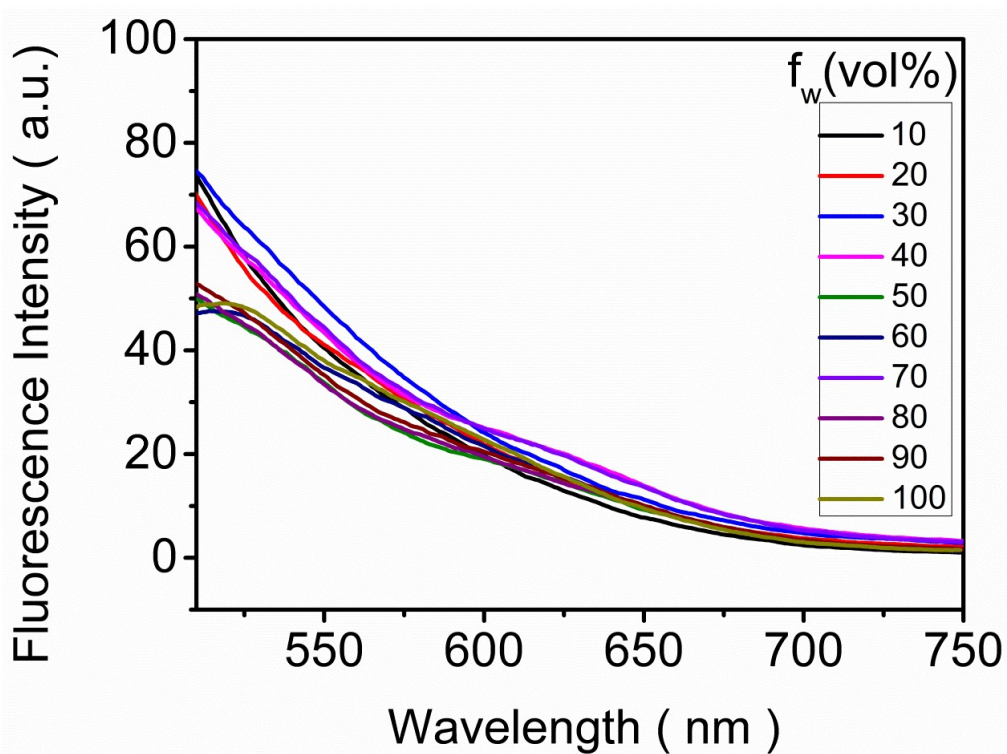

Fig S5 Spectrum character and diameter of QM-CIO ( $f_w$ ) in a different ratios of PBS/DMSO.

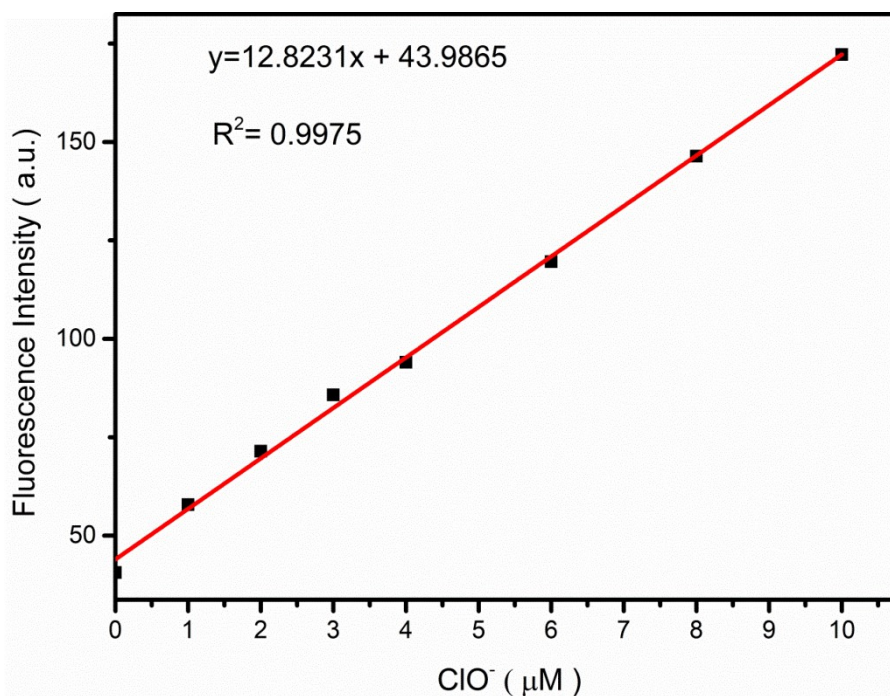

Fig S6. Linear plot of the fluorescence emission against  $\text{ClO}^-$  concentrations. ( $\lambda_{\text{ex}} = 430 \text{ nm}$ ).

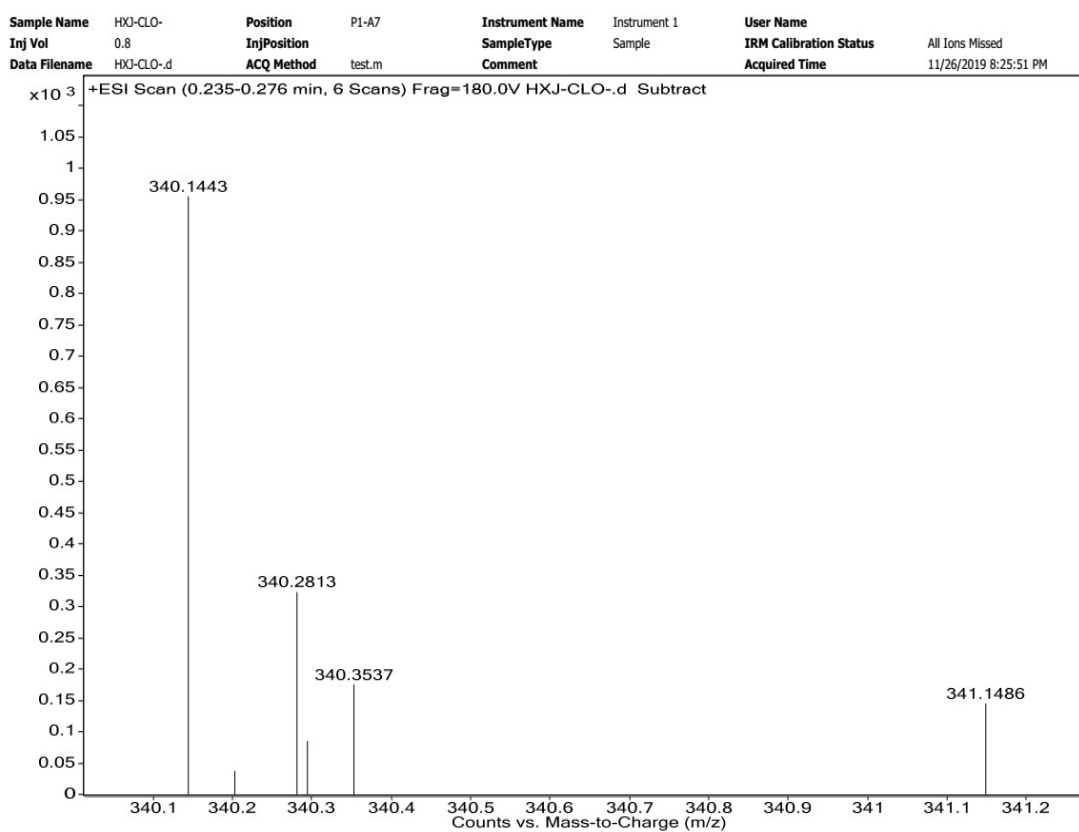

Fig S7. HR-MS spectra of QM-CIO in the presence of  $\text{ClO}^-$  (10 equiv.)

**Table S1. Comparison of reported probes for recognition of HClO.**

| Structure                                                                                                                                             | $\lambda_{\text{ex}}/\lambda_{\text{em}}$<br>(nm) | Response<br>time | Detection<br>limit     | AIE | Cell<br>imaging                                                     |
|-------------------------------------------------------------------------------------------------------------------------------------------------------|---------------------------------------------------|------------------|------------------------|-----|---------------------------------------------------------------------|
| 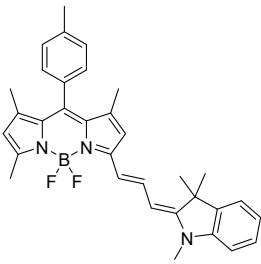 <p>Sensors and Actuators B:<br/>Chemical <b>2017</b>246 293-299</p> | 488/511<br>635/713                                | 10 s             | 10.6nM                 | NO  | Endogenous and exogenous hypochlorous acid in cell lysosomes.       |
|  <p>Anal. Chem. <b>2017</b>, 89, 10384-10390</p>                    | 405/505                                           | 150 s            | 0.674 $\mu\text{M}$    | NO  | Detection of HClO in intracellular lysosomes.                       |
|  <p>Chem. Sci., <b>2018</b>, 9, 6035</p>                           | 426/492,<br>562                                   | 60 s             | 89 nM                  | NO  | The production of HClO during wound healing in mice.                |
|  <p>Sensors and Actuators B<br/><b>2018</b>260 832-840</p>         | 360/465                                           | 20 min           | $8.2 \times 10^{-9}$ M | NO  | Membrane permeability and low toxicity                              |
|  <p>Chem. Commun., <b>2019</b>, 55, 12912</p>                      | 365/437,<br>497                                   | 60 s             | 16 nM                  | NO  | Production of hypochlorous acid during alcohol-induced liver injury |

|                                                                                                                                                                                       |                               |                     |                            |     |                                                                                                                                                         |
|---------------------------------------------------------------------------------------------------------------------------------------------------------------------------------------|-------------------------------|---------------------|----------------------------|-----|---------------------------------------------------------------------------------------------------------------------------------------------------------|
| 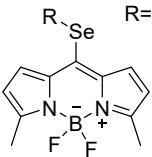 <p>R-Se R=Et, PhCH<sub>2</sub> or Ph</p> <p>J. Mater. Chem. B, <b>2019</b>, 7, 6861</p>             | 532/548<br>530/545<br>532/550 | 2 s<br>5 s<br>100 s | 0.3 nM<br>0.8 nM<br>9.2 nM | NO  | Exogenous and endogenous hypochlorous acid, and localized in mitochondria                                                                               |
|  <p>Sensors and Actuators: B. Chemical <b>2021</b>327 128884</p>                                     | 680/710                       | 5s                  | 0.09 μM                    | NO  | Fluctuations in endogenous hypochlorous acid produced by the immune system during Staphylococcus aureus infection and muscle tissue injury in live mice |
|  <p>Spectrochimica Acta Part A: Molecular and Biomolecular Spectroscopy <b>2020</b> 239 118515</p> | 365/450, 580                  | 3 min               | $4.2 \times 10^{-7}$ M     | NO  | Cellular imaging of hypochlorous acid                                                                                                                   |
|  <p>Talanta<b>2021</b> 233 122581</p>                                                              | 630/738                       | immediate           | 0.09 μM                    | NO  | Exogenous and endogenous detection HClO                                                                                                                 |
|  <p>This work</p>                                                                                  | 430/620                       | 100 s               | 30.8 nM                    | Yes | Changes of hypochlorous acid content during CCCP-induced cell apoptosis                                                                                 |
